# Supplementary material
Source: Springer Nature journal article supplement (https://www.springermedizin.de/resource/supplementary/12885_2013_4715_MOESM2_ESM.pdf/9466926)
Supplement: MOESM2 [file 9466926]

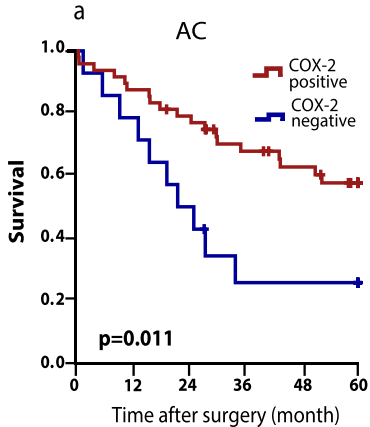

Number at risk

|               |    |    |    |    |    |    |
|---------------|----|----|----|----|----|----|
| COX-2 positiv | 48 | 42 | 37 | 29 | 25 | 20 |
| COX-2 negativ | 14 | 11 | 7  | 3  | 3  | 3  |

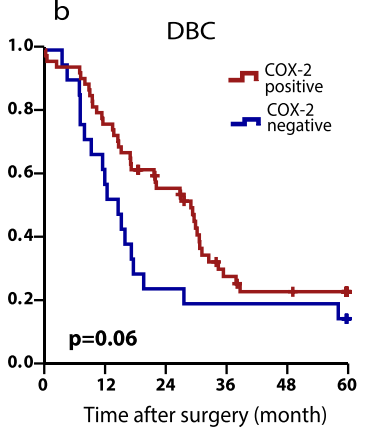

|    |    |    |    |   |   |
|----|----|----|----|---|---|
| 55 | 42 | 28 | 12 | 9 | 8 |
| 21 | 12 | 5  | 4  | 4 | 3 |

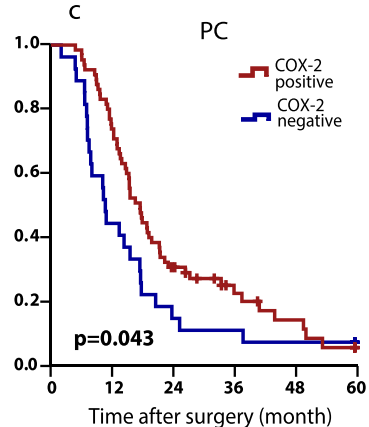

|    |    |    |    |   |   |
|----|----|----|----|---|---|
| 65 | 48 | 19 | 10 | 5 | 2 |
| 27 | 12 | 4  | 3  | 2 | 2 |

*Pancreaticobiliar*

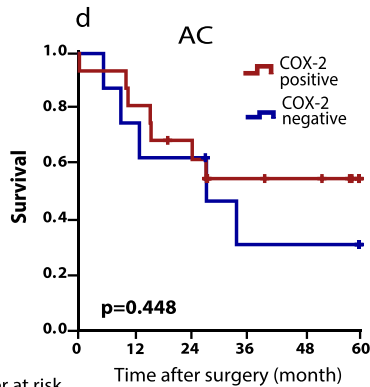

Number at risk

|               |    |    |    |   |   |   |
|---------------|----|----|----|---|---|---|
| COX-2 positiv | 16 | 13 | 10 | 6 | 5 | 2 |
| COX-2 negativ | 8  | 6  | 5  | 2 | 2 | 2 |

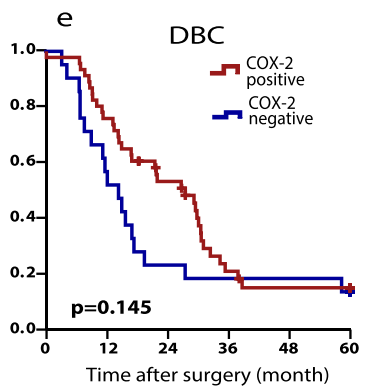

|    |    |    |   |   |   |
|----|----|----|---|---|---|
| 46 | 35 | 22 | 8 | 5 | 5 |
| 21 | 12 | 5  | 4 | 4 | 3 |

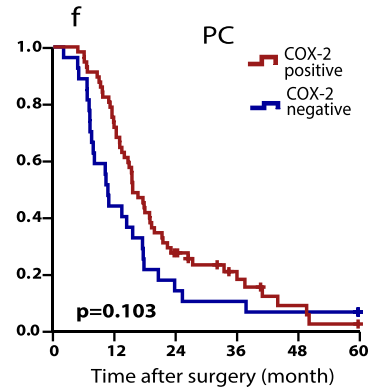

|    |    |    |   |   |   |
|----|----|----|---|---|---|
| 57 | 41 | 15 | 8 | 3 | 1 |
| 27 | 12 | 4  | 3 | 2 | 2 |

*Intestinal*

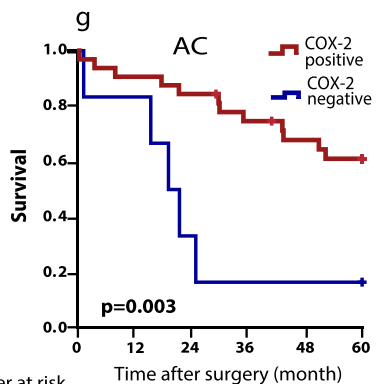

Number at risk

|               |    |    |    |    |    |    |
|---------------|----|----|----|----|----|----|
| COX-2 positiv | 32 | 29 | 27 | 23 | 20 | 18 |
| COX-2 negativ | 6  | 5  | 2  | 1  | 1  | 1  |

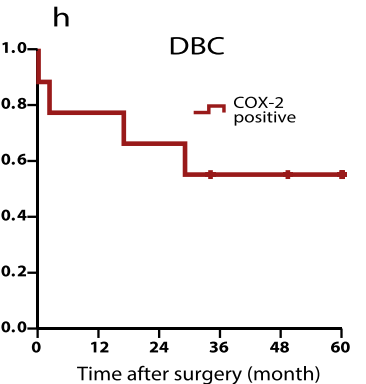

|   |   |   |   |   |   |
|---|---|---|---|---|---|
| 9 | 7 | 6 | 4 | 4 | 3 |
| 0 |   |   |   |   |   |

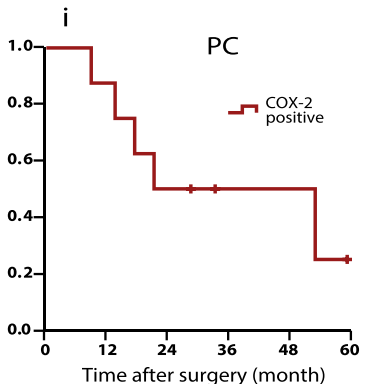

|   |   |   |   |   |   |
|---|---|---|---|---|---|
| 8 | 7 | 4 | 2 | 2 | 1 |
| 0 |   |   |   |   |   |
